# Supplementary material for: PERK Signaling Regulates Extracellular Proteostasis of an Amyloidogenic Protein During Endoplasmic Reticulum Stress
Source: PubMed Central journal article supplement (PMC6344643; doi:10.1038/s41598-018-37207-0), 2019-01-23

**Supplement to:  
PERK Signaling Regulates Extracellular Proteostasis of an Amyloidogenic Protein During Endoplasmic Reticulum Stress**

Isabelle C. Romine and R. Luke Wiseman\*

Department of Molecular Medicine, The Scripps Research Institute, La Jolla, CA 92037

\*To whom correspondences should be addressed:

R. Luke Wiseman  
Department of Molecular Medicine  
The Scripps Research Institute  
10550 N. Torrey Pines Rd. MEM 220  
La Jolla, CA 92037  
Email: [wiseman@scripps.edu](mailto:wiseman@scripps.edu)  
Phone: (858) 784-8820

Running Title: PERK regulates extracellular proteostasis

| <b>Supplemental Information Table of Contents</b> |                           |                                     |
|---------------------------------------------------|---------------------------|-------------------------------------|
| <b>Page</b>                                       | <b>Title</b>              | <b>Description</b>                  |
| 1                                                 | Cover Page                | Description of Supplemental Content |
| 2                                                 | Supplemental Figure 1     | Relevant to Figure 1                |
| 3                                                 | Supplemental Figure 2     | Relevant to Figure 2                |
| 4                                                 | Supplemental Figure 3     | Relevant to Figure 3                |
| 5                                                 | Supplemental Figure 4     | Relevant to Figure 4                |
| 6                                                 | Whole gels for Figure 1A  | Raw data for Figure 1A              |
| 7                                                 | Whole gels for Figure 2E  | Raw data for Figure 2E              |
| 8                                                 | Whole gels for Figure 3C  | Raw data for Figure 3C              |
| 9                                                 | Whole gels for Figure S1A | Raw data for Figure S1A             |
| 10                                                | Whole gels for Figure S1F | Raw data for Figure S1F             |
| 11                                                | Whole gels for Figure S3  | Raw data for Figure S3              |
| 12                                                | Whole gels for Figure S4A | Raw data for Figure S4A             |
| 13                                                | Whole gels for Figure S4B | Raw data for Figure S4B             |
| 14                                                | Whole gels for Figure S4C | Raw data for Figure S4C             |

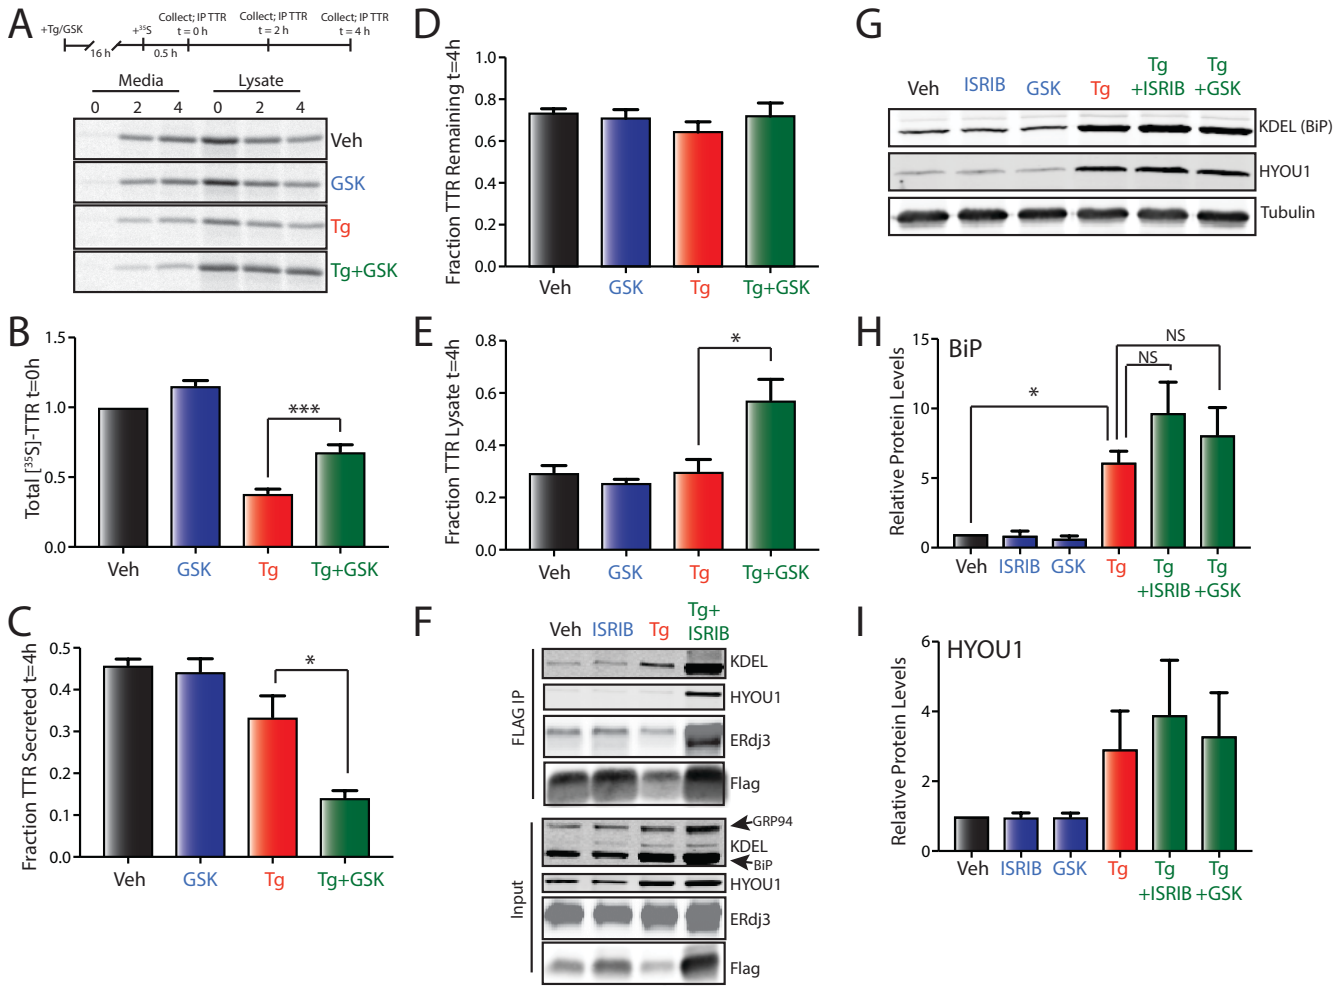

### Supplemental Figure 1 (Relevant to Figure 1)

- A.** Representative autoradiogram of [<sup>35</sup>S]-labeled FT-TTR<sup>A25T</sup> in lysates and media collected from HEK293T cells pretreated for 16 h with thapsigargin (Tg; 500 nM) and/or GSK (300 nM). The protocol for the experiment is shown above.
- B.** Graph showing the total amount of [<sup>35</sup>S]-labeled FT-TTR<sup>A25T</sup> at t = 0 h in HEK293T cells pretreated for 16 h with thapsigargin (Tg; 500 nM) and/or GSK (300 nM). Data are shown normalized to vehicle-treated cells. Error bars show SEM for n=3 independent experiments. A representative autoradiogram is shown in **Fig. S1A**.
- C.** Graph showing the fraction [<sup>35</sup>S]-labeled FT-TTR<sup>A25T</sup> secreted at t = 4 h in HEK293T cells pretreated for 16 h with thapsigargin (Tg; 500 nM) and/or GSK (300 nM). Fraction secreted was calculated as described in **Materials and Methods**. Error bars show SEM for n=3 independent experiments. A representative autoradiogram is shown in **Fig. S1A**.
- D.** Graph showing the fraction [<sup>35</sup>S]-labeled FT-TTR<sup>A25T</sup> remaining at t = 4 h in HEK293T cells pretreated for 16 h with thapsigargin (Tg; 500 nM) and/or GSK (300 nM). Fraction remaining was calculated as described in **Materials and Methods**. Error bars show SEM for n=3 independent experiments. A representative autoradiogram is shown in **Fig. S1A**.
- E.** Graph showing the fraction [<sup>35</sup>S]-labeled FT-TTR<sup>A25T</sup> in lysates at t = 4 h in HEK293T cells pretreated for 16 h with thapsigargin (Tg; 500 nM) and/or GSK (300 nM). Fraction lysate was calculated as described in **Materials and Methods**. Error bars show SEM for n=3 independent experiments. A representative autoradiogram is shown in **Fig. S1A**.
- F.** Representative immunoblot showing anti-FLAG IPs and inputs from lysates prepared from HEK293T cells expressing FT-TTR<sup>A25T</sup> and pretreated for 16 h with Tg (500 nM) and/or ISRIB (200 nM). \*indicates p<0.05; \*\*indicates p<0.01 for a paired two-tailed t-test.
- G.** Representative immunoblot of lysates prepared from HEK293T cells pretreated for 16 hours with Tg (500 nM), ISRIB (200 nM), and/or GSK (300 nM), as indicated.

- H. Graph showing quantifications for BiP from immunoblots as shown in **Fig. 1G**. Data are shown normalized to vehicle-treated cells. Error bars show n=3. \*indicates p<0.05.
- I. Graph showing quantifications for HYOU1 from immunoblots as shown in **Fig. 1G**. Data are shown normalized to vehicle-treated cells. Error bars show n=3. \*indicates p<0.05.

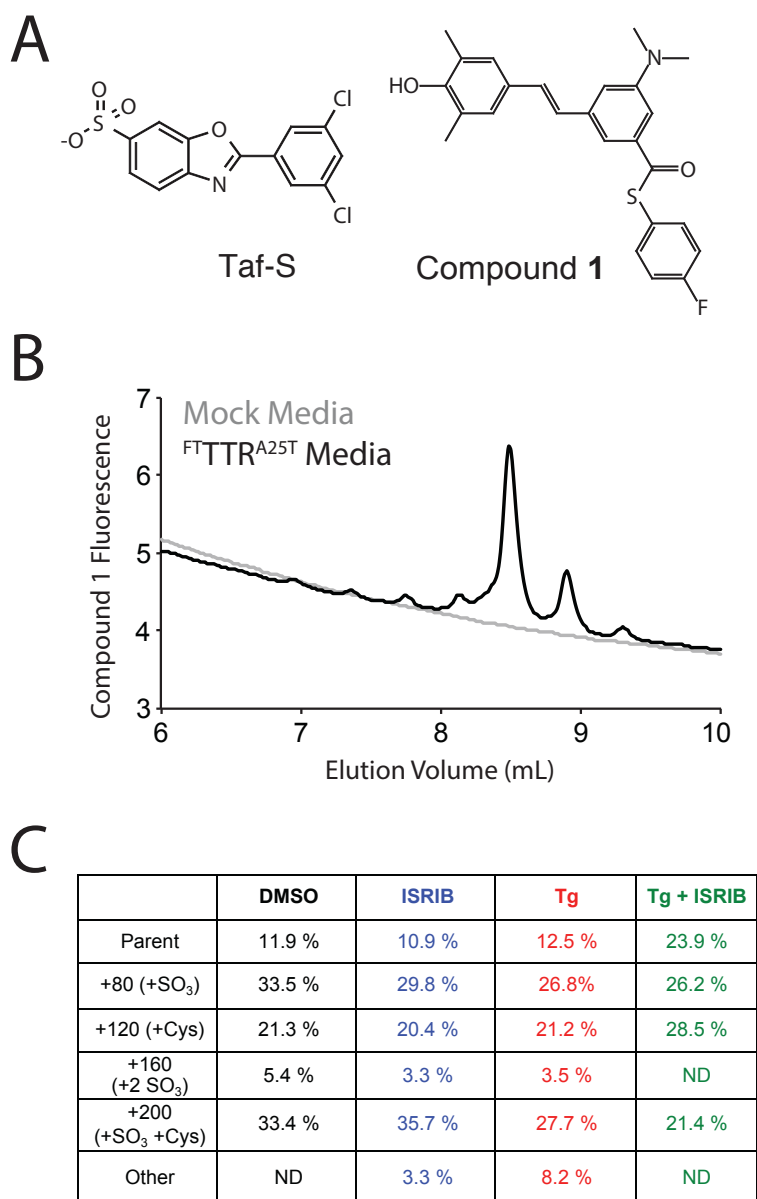

**Supplemental Figure 2 (Relevant to Figure 2)**

- A.** Structures of tafamidis-sulfonate (Taf-S) and the fluorogenic TTR ligand compound **1**.
- B.** Chromatogram of conditioned media prepared in the presence of Taf-S (10 μM) on mock-transfected HEK293T cells or HEK293T cells expressing <sup>FT</sup>TTR<sup>A25T</sup>. <sup>FT</sup>TTR<sup>A25T</sup> tetramers were separated on anion exchange chromatography using the UPLC system and visualized by compound **1** fluorescence.
- C.** Table showing the relative populations of unmodified and posttranslationally modified <sup>FT</sup>TTR<sup>A25T</sup> in conditioned media prepared on HEK293T cells treated for 16 h with Tg (500 nM) and/or ISRIB (200 nM). Please see **Materials and Methods** for further description of this experiment.

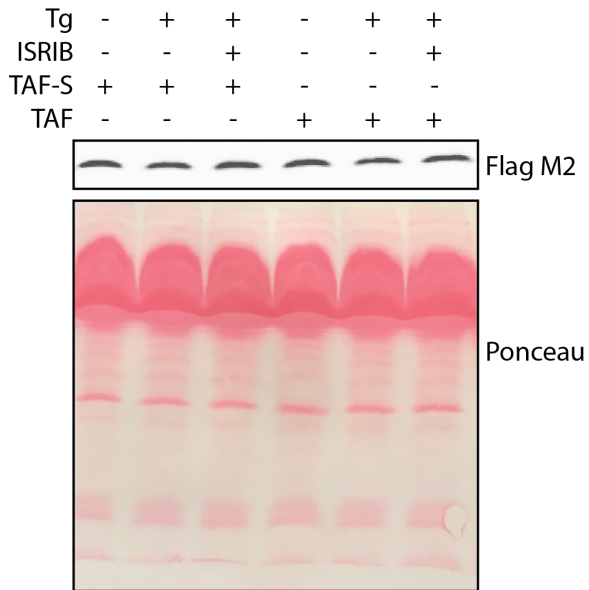

**Supplemental Figure 3 (Relevant to Figure 3)**

Representative immunoblot of  $F^I$ TTR<sup>A25T</sup> in conditioned media prepared in the presence of Taf-S (10  $\mu$ M) or Taf (10  $\mu$ M) on HEK293T cells treated for 16 h with Tg (500 nM) and/or ISRIB (200 nM). A ponceau stain of the immunoblot is shown as a control.

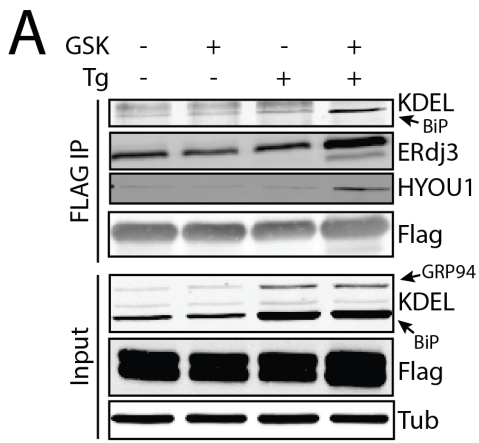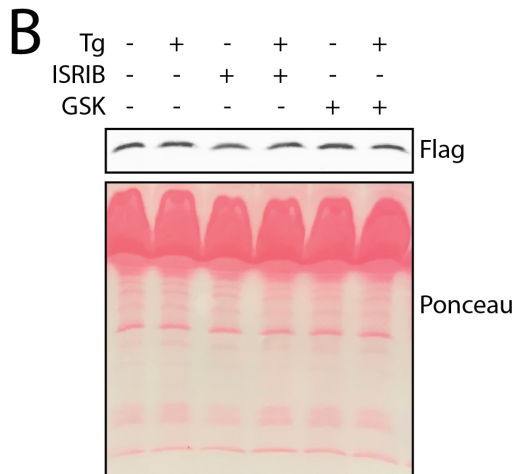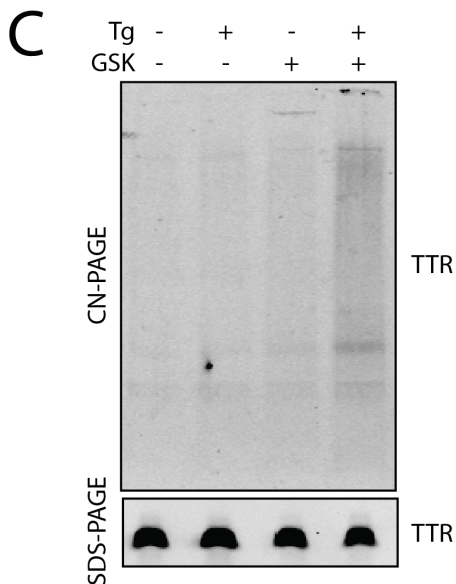

**Supplemental Figure 4 (Relevant to Figure 4).**

- Representative immunoblot showing anti-FLAG IPs and inputs from lysates prepared from HEK293T cells expressing  $^{FT}TTR^{WT}$  and pretreated for 16 h with Tg (500 nM) and/or GSK (300 nM).
- Representative immunoblot of  $^{FT}TTR^{WT}$  in conditioned media prepared in the presence of Taf-S (10  $\mu$ M) on HEK293T cells treated for 16 h with Tg (500 nM), ISRIB (200 nM), or GSK (300 nM). A ponceau stain of the immunoblot is shown as a control.
- Representative CN-PAGE/immunoblot of  $^{FT}TTR^{WT}$  aggregates in conditioned media prepared in the presence of Taf-S (10  $\mu$ M) on HEK293T cells treated for 16 h with Tg (500 nM) and/or GSK (300 nM). A SDS-PAGE/immunoblot showing total  $^{FT}TTR^{WT}$  is shown as a control.

# Figure 1A Raw Data (Whole Gel Exposure)

Vehicle

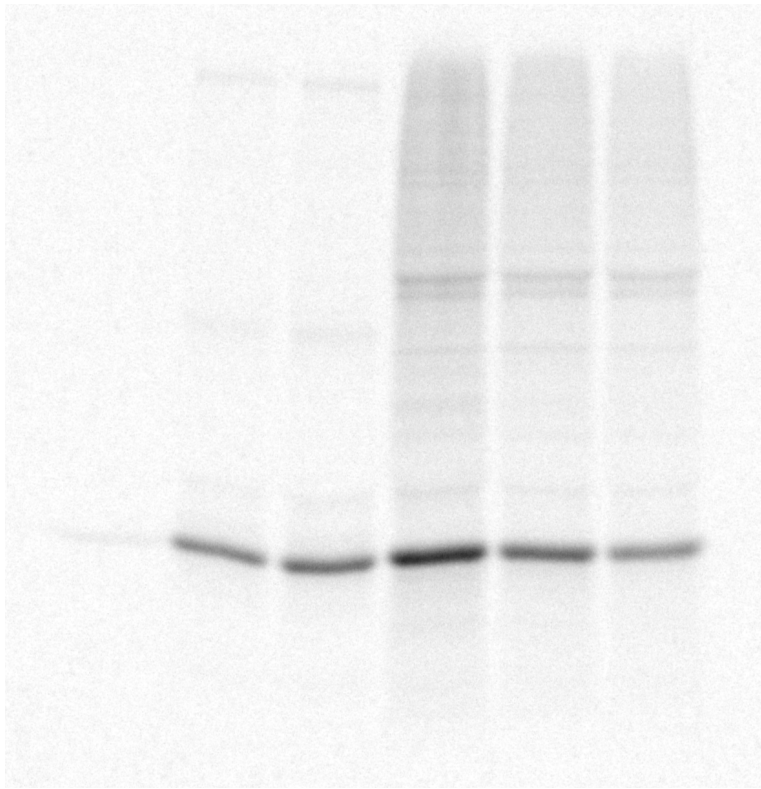

Thapsigargin

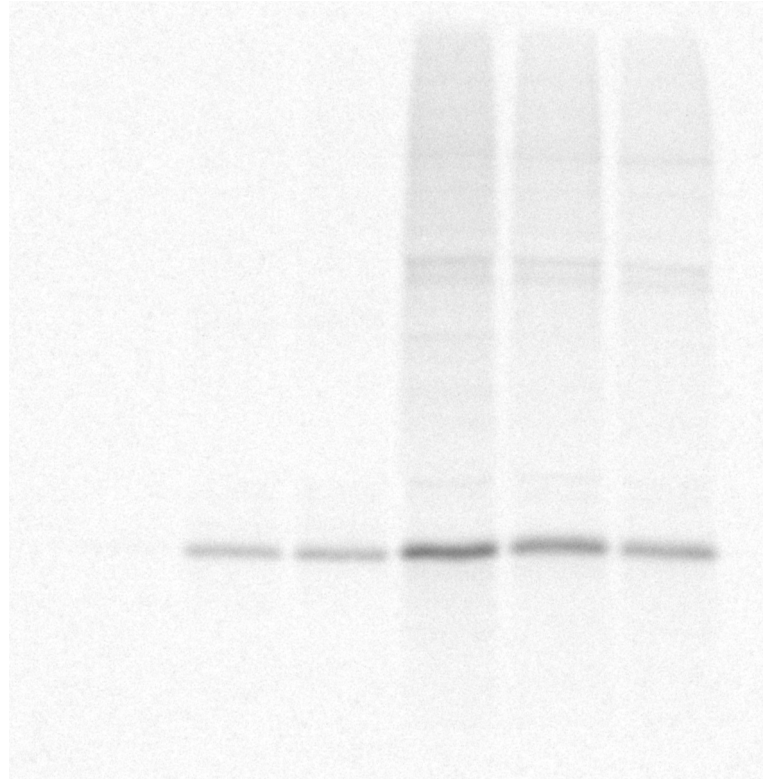

ISRIB

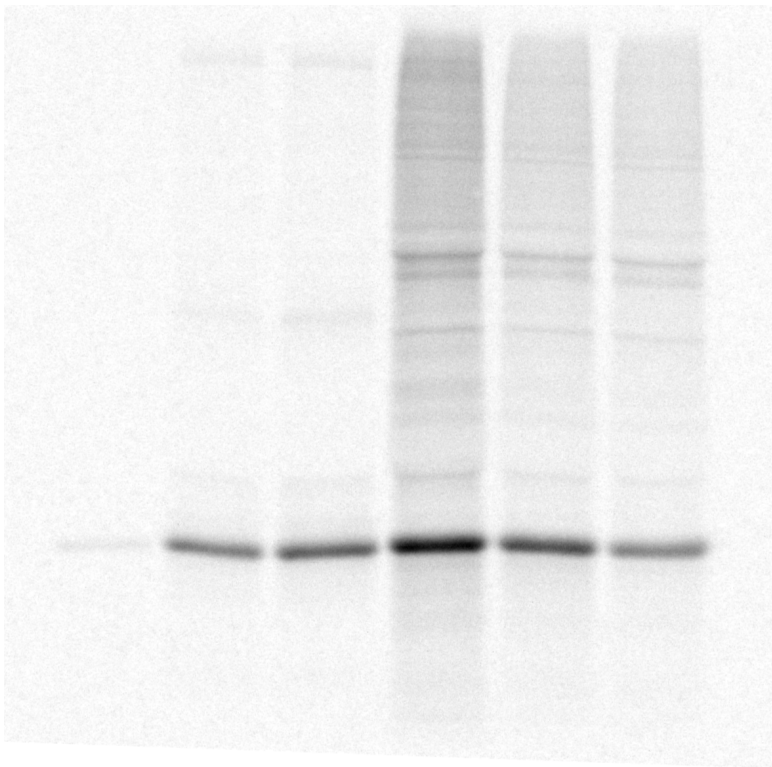

Thapsigargin and ISRIB

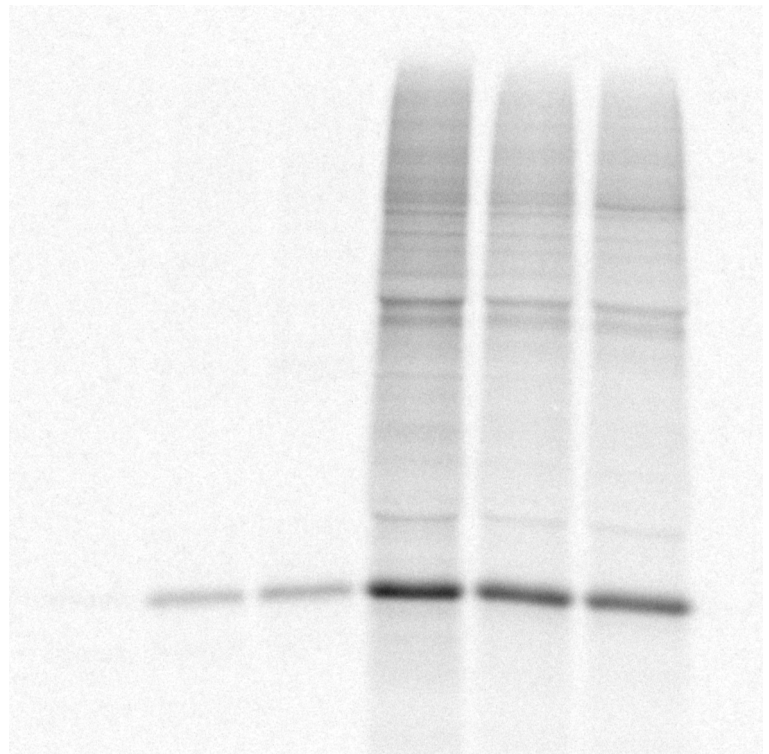

Figure 2E Raw Data (Whole Gels)

Veh Tg ISRIB Tg+  
ISRIB

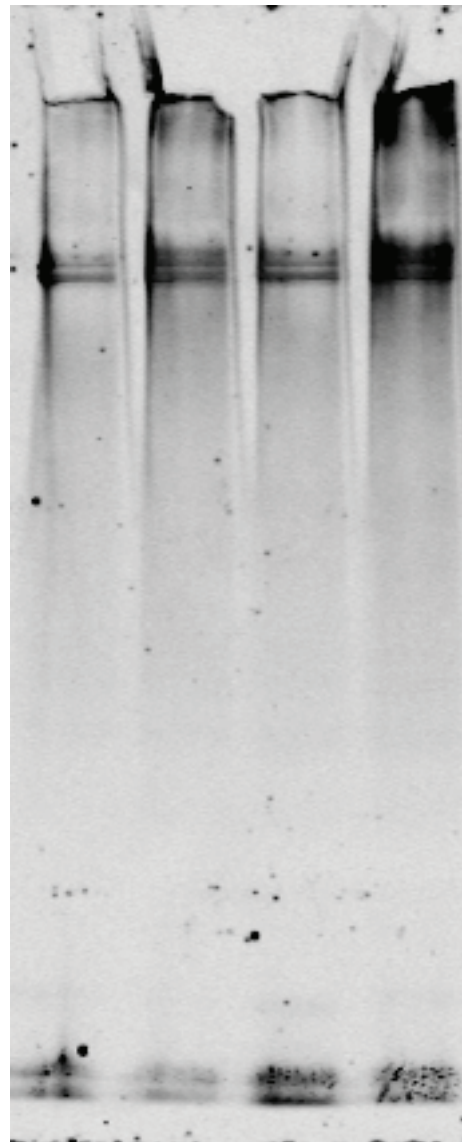

CN-PAGE  
IB:FLAG

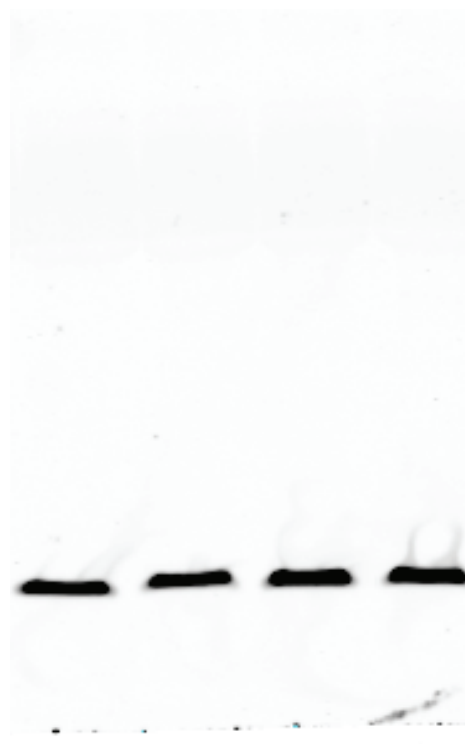

SDS-PAGE  
IB:FLAG

Figure 3C Raw Data (Whole Gels)

|       | TAF-S |   |   | TAF |   |   |
|-------|-------|---|---|-----|---|---|
| Tg    | -     | + | + | -   | + | + |
| ISRIB | -     | - | + | -   | - | + |

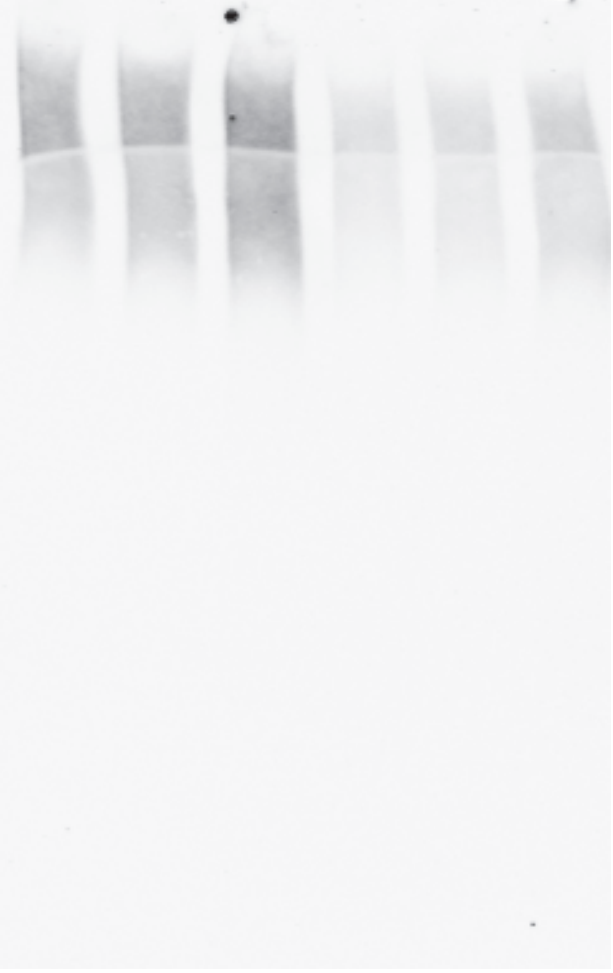

CN-PAGE  
IB:FLAG

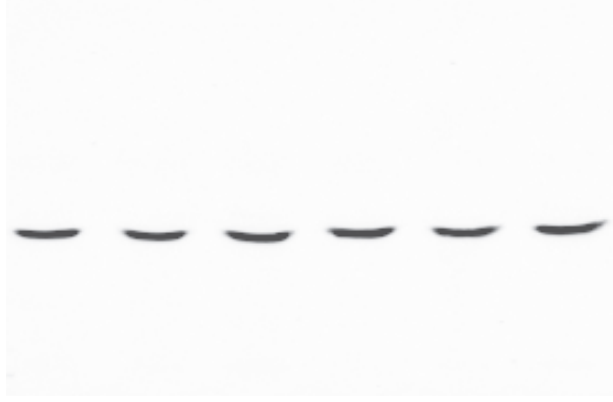

SDS-PAGE  
IB:FLAG



# Figure S1A Raw Data (Whole Gel Exposure)

Vehicle

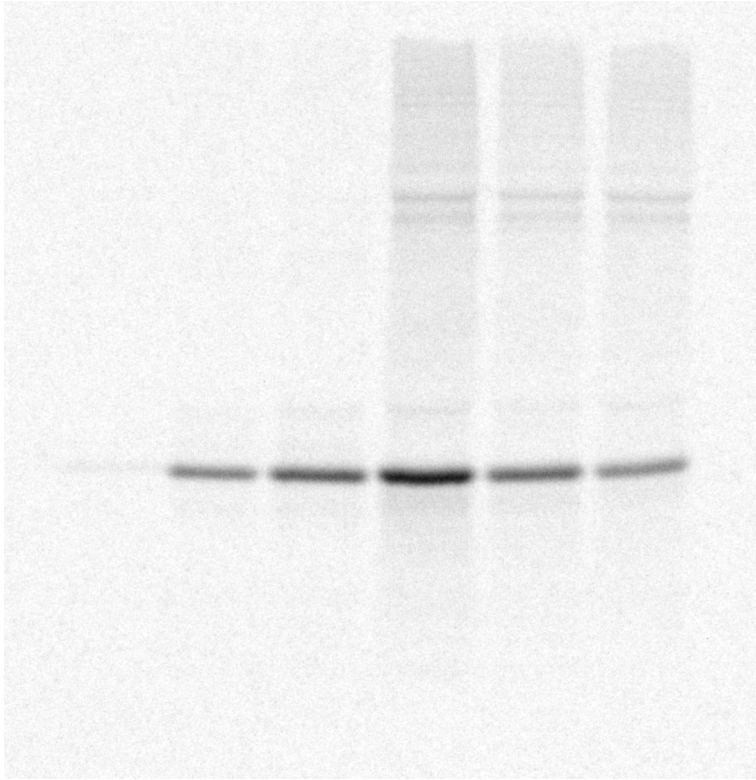

Thapsigargin

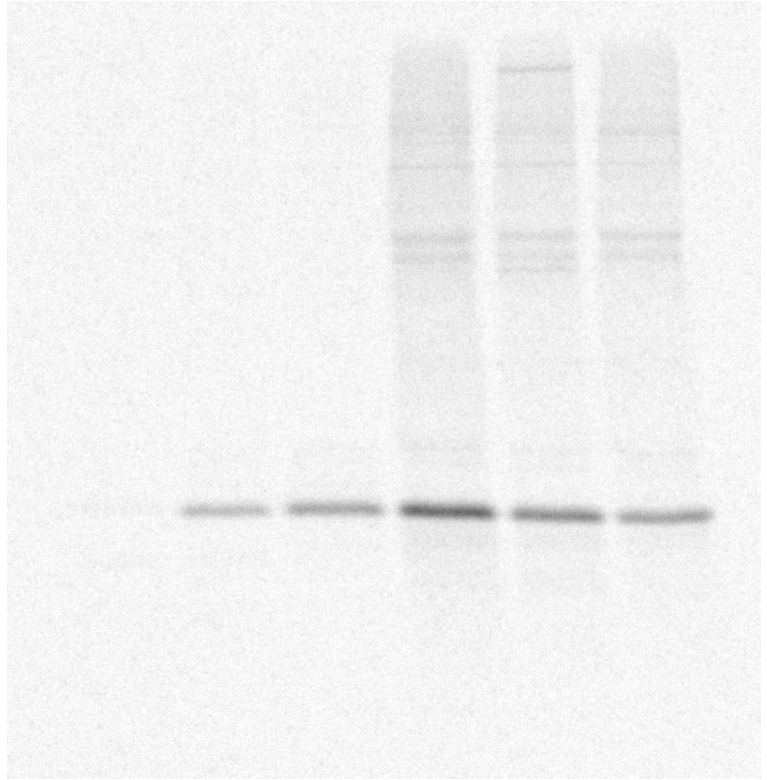

GSK

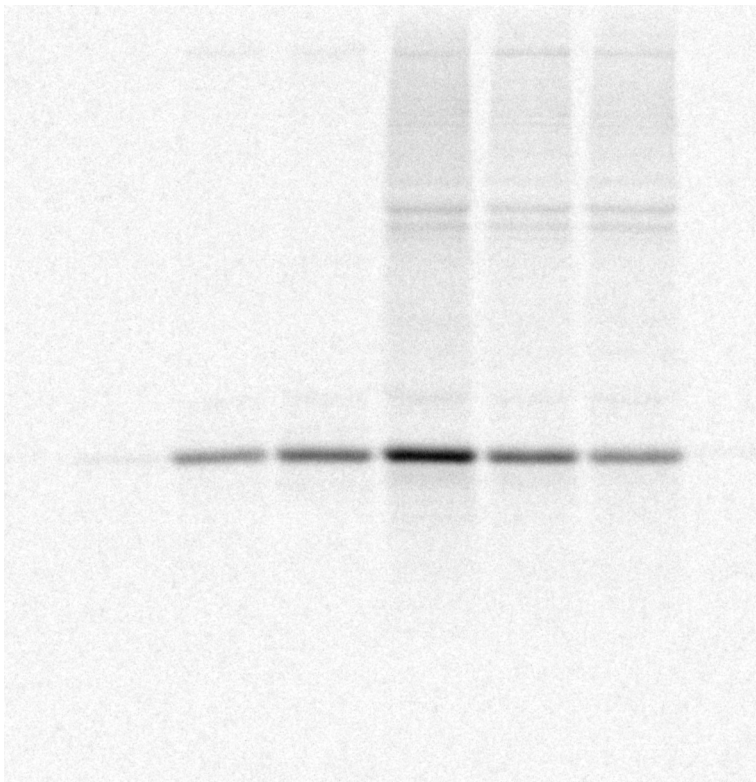

Thapsigargin and GSK

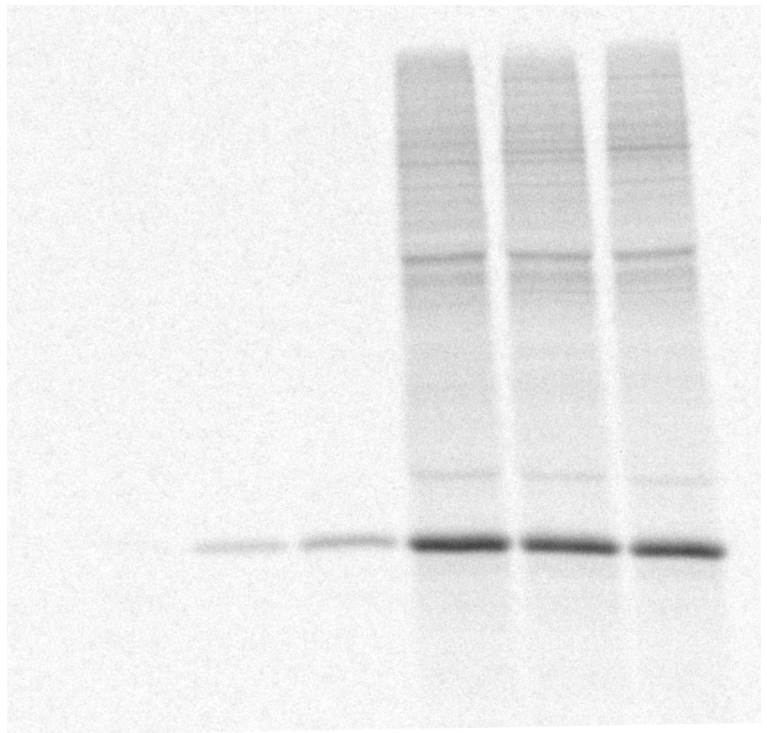

# Figure S1F Raw Data (Whole Gels)

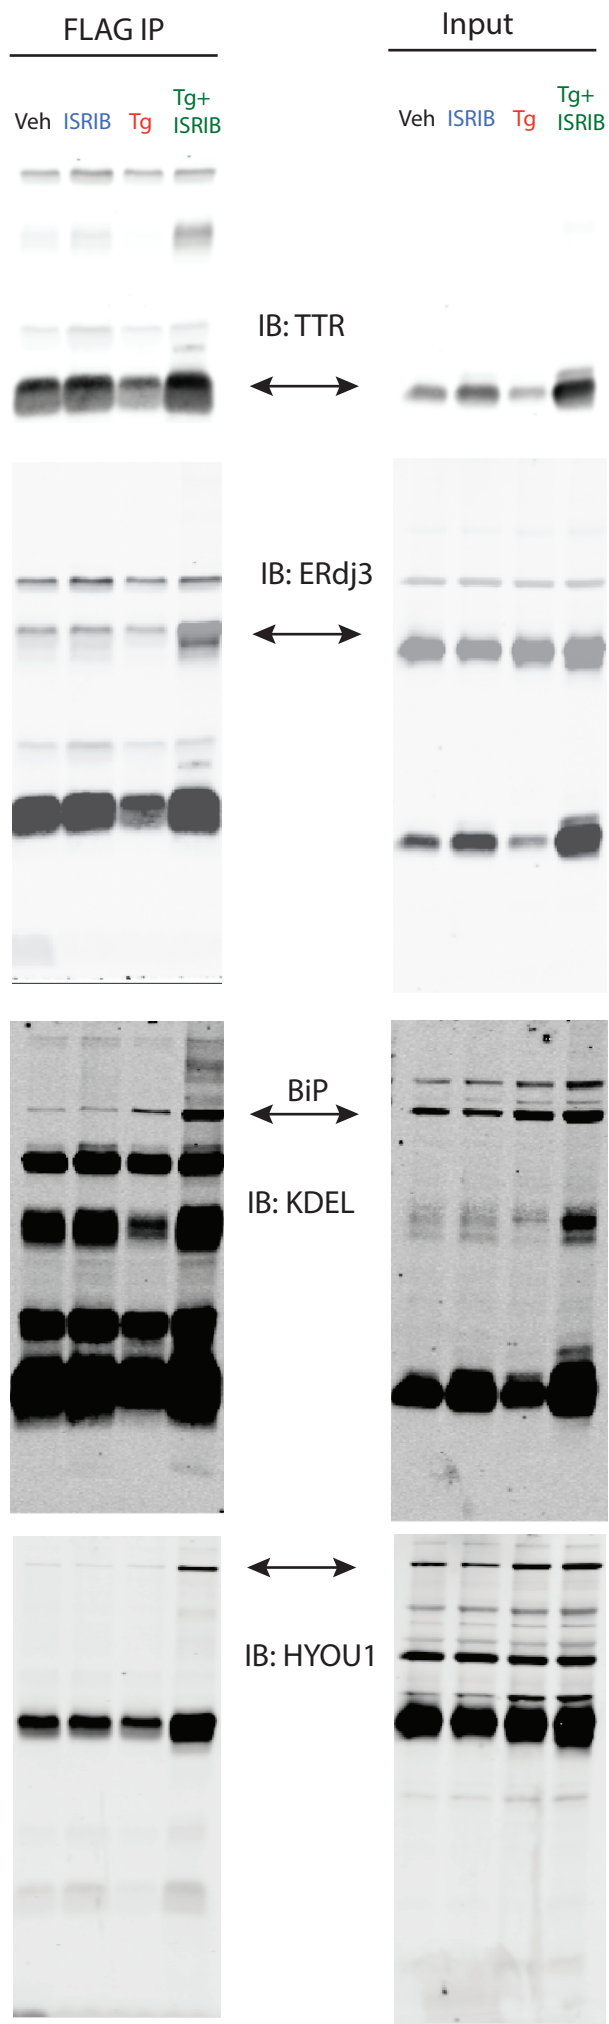

Figure S3 Raw Data (Whole Gels)

|       |   |   |   |   |   |   |
|-------|---|---|---|---|---|---|
| Tg    | - | + | + | - | + | + |
| ISRIB | - | - | + | - | - | + |
| TAF-S | + | + | + | - | - | - |
| TAF   | - | - | - | + | + | + |

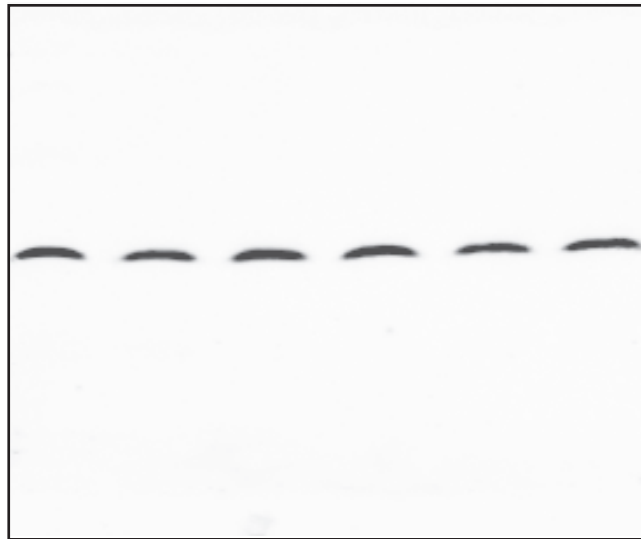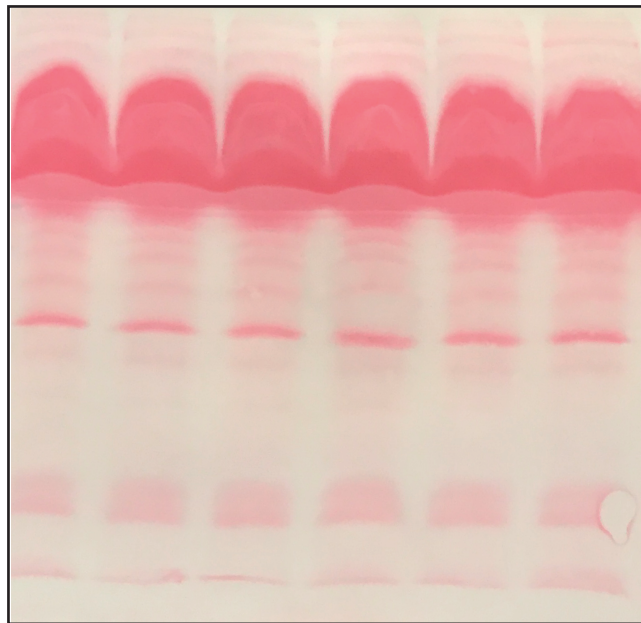

# Figure S4A Raw Data (Whole Gels)

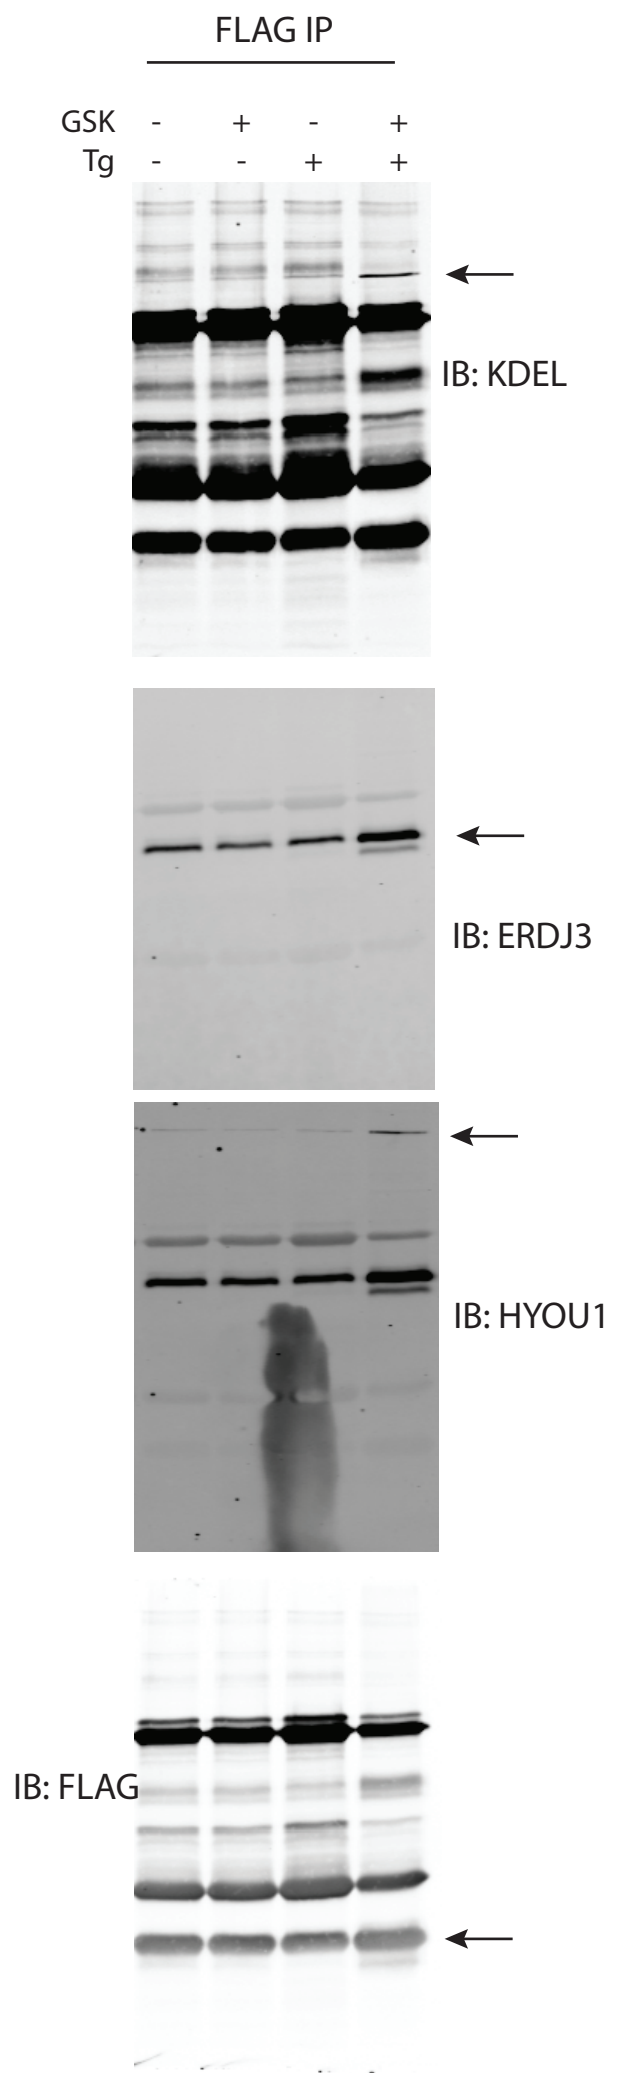

# Figure S4B Raw Data (Whole Gels)

FTTTR<sup>WT</sup>

|       |   |   |   |   |   |   |
|-------|---|---|---|---|---|---|
| Tg    | - | + | - | + | - | + |
| ISRIB | - | - | + | + | - | - |
| GSK   | - | - | - | - | + | + |

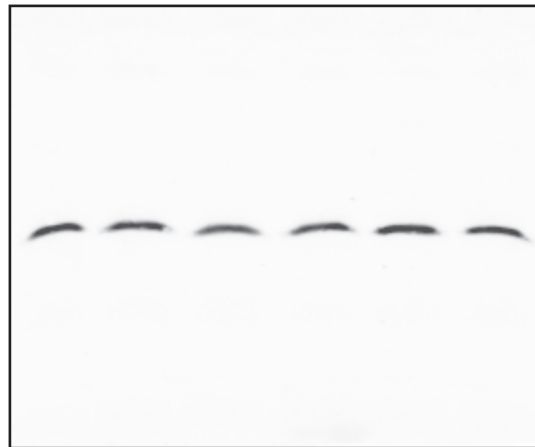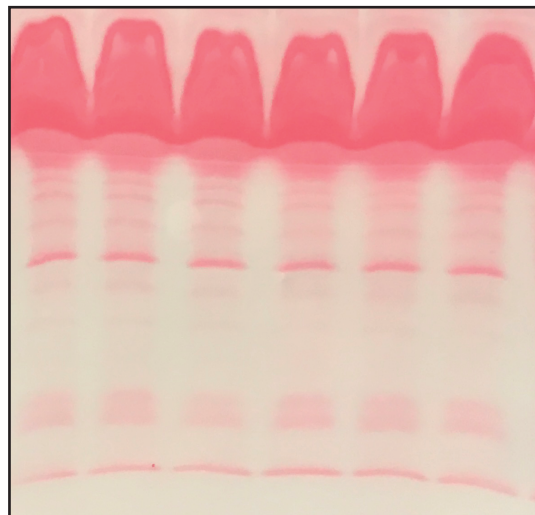

Figure S4C Raw Data (Whole Gels)

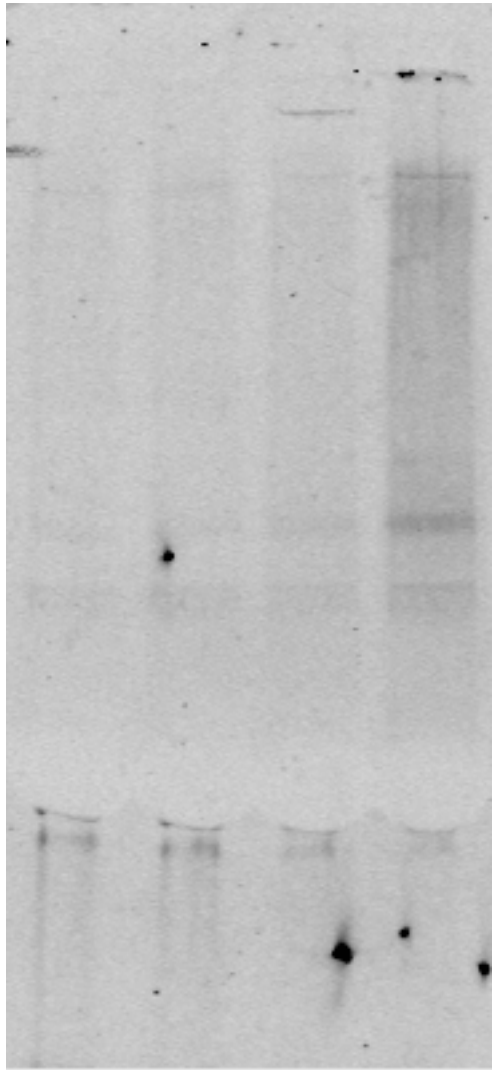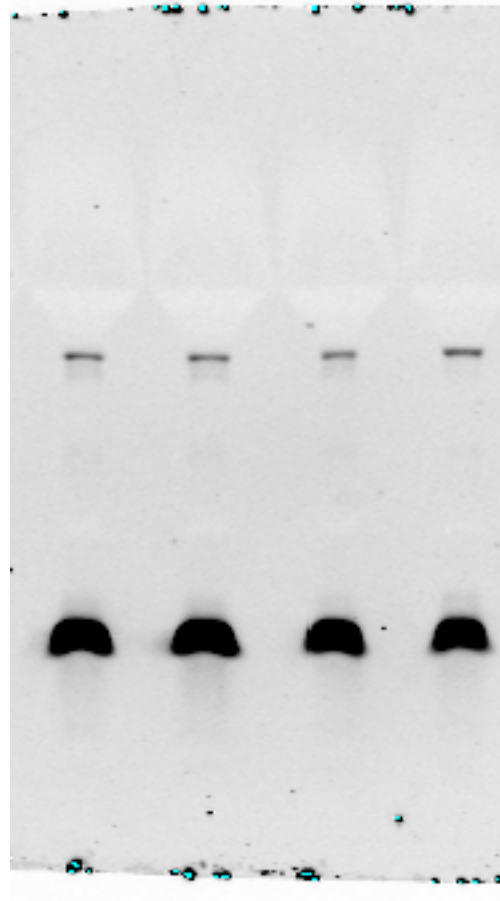

Supplement: 41598_2018_37207_MOESM1_ESM.pdf [file 41598_2018_37207_MOESM1_ESM.pdf]
